# Supplementary material for: An immunomodulatory encapsulation system to deliver human iPSC-derived dopaminergic neuron progenitors for Parkinson's disease treatment
Source: Royal Society of Chemistry journal article supplement (doi:10.1039/d4bm01566e), 2025-01-01
Supplement: d4bm01566e1.pdf [file d4bm01566e1.pdf]

## Supplementary Information

### An immunomodulatory encapsulation system to deliver human iPSC-derived dopaminergic neuron progenitors for Parkinson's disease treatment

Emily A. Atkinson<sup>1,2,\*</sup>, Holly N. Gregory<sup>1,2</sup>, Lara N. Carter<sup>1,2</sup>, Rachael E. Evans<sup>1,2</sup>, Victoria H. Robertson,<sup>1,2</sup> Rachael Dickman,<sup>1</sup> James B. Phillips<sup>1,2,\*</sup>

<sup>1</sup> UCL School of Pharmacy, University College London, London, UK.

<sup>2</sup> UCL Centre for Nerve Engineering, University College London, London, UK

\* Corresponding authors: [emily.atkinson@ucl.ac.uk](mailto:emily.atkinson@ucl.ac.uk), [jb.phillips@ucl.ac.uk](mailto:jb.phillips@ucl.ac.uk)

#### Contents

##### Materials

**Table S1:** Details of materials, suppliers and catalogue numbers.

**Table S2:** Details of antibodies, suppliers and catalogue numbers.

##### Results

**Figure S1:** Extended heatmap showing the detection of cytokines in the secretome of cells throughout differentiation towards dopaminergic neurons.

**Equations S1-4:** Calculations based on Tate's Law used to calculate droplet diameter.

**Table S3:** Assumptions made using Tate's Law to calculate droplet diameter.

##### References

## Materials

**Table S1: Details of materials, suppliers and catalogue numbers.**

| <b>Cells/reagents</b>                                     | <b>Supplier</b>                    | <b>Catalogue Number</b> |
|-----------------------------------------------------------|------------------------------------|-------------------------|
| Human induced pluripotent stem cells (hiPSC, CGT-RCiB-10) | Cell and Gene Therapy Catapult, UK | N/A                     |
| B-27 supplement (50X) serum free                          | ThermoFisher Scientific            | 17504044                |
| Bovine Serum Albumin (BSA)                                | Sigma Aldrich                      | A9418                   |
| Brain derived neurotrophic factor (BDNF, human)           | Cambridge Bioscience               | Z03208-5                |
| Calcium chloride                                          | Fisher Scientific                  | 15607730                |
| CellTrace™ CFSE Cell Proliferation Kit                    | ThermoFisher Scientific            | C34554                  |
| CHIR99021                                                 | Cambridge Bioscience               | SM13-1                  |
| CryoStor™                                                 | Sigma Aldrich                      | C2874                   |
| Dopamine ELISA                                            | Elabscience®                       | E-EL-0046               |
| DAPT                                                      | Cambridge Bioscience               | SM15-2                  |
| Dulbecco's Modified Eagle Medium (DMEM)                   | ThermoFisherScientific             |                         |
| DMEM/F12: Neurobasal (-glutamine)                         | ThermoFisher Scientific            | 21331020                |
| DPBS                                                      | ThermoFisher Scientific            | 14190144                |
| EasySep™ Human CD3 Positive Selection Kit II              | STEMCELL™ Technologies             | 17851                   |
| EDTA (UltraPure 0.5M)                                     | ThermoFisher Scientific            | 15575020                |
| Essential 8 Basal Medium                                  | ThermoFisher Scientific            | A1517001                |
| Essential 8 Basal Medium Supplement                       | ThermoFisher Scientific            | A1517001                |
| Foetal Bovine Serum (FBS)                                 | Sigma Aldrich                      | F74524                  |
| Hoechst 33258                                             | Sigma Aldrich                      | 861405                  |
| Human cytokine array                                      | R&D Systems                        | ARY005B                 |
| L-glutamine                                               | Sigma Aldrich                      | G7513                   |
| Laminin I                                                 | Bio-Techne                         | 3401-010-02             |
| 1x N2 Supplement                                          | ThermoFisher Scientific            | 17502058                |
| Noggin                                                    | Bio-Techne                         | 3344-NG-050             |
| Normal horse serum (NHS)                                  | Vector Laboratories                | S-2000                  |
| Normal goat serum (NGS)                                   | Dako                               | X0907                   |
| Neurobasal medium                                         | ThermoFisher Scientific            | A1371201                |
| Paraformaldehyde (PFA)                                    | ThermoFisher Scientific            | P/0840/53               |
| Phosphate buffered saline                                 | Sigma Aldrich                      | P4417-100TAB            |
| Poly-L-Ornithine                                          | Merck                              | P3655-10MG              |
| SB431542                                                  | Miltenyi Biotech                   | 130-106-275             |
| SHH-C24II                                                 | Bio-Techne                         | 1845-SH-025             |
| Sodium Alginate (PROVONA SLM 100)                         | Merck                              | 4202301                 |
| Sunflower oil                                             | Waitrose                           | N/A                     |
| Tacrolimus (FK506)                                        | Abcam                              | Ab120223                |
| Triton X-100                                              | Sigma Aldrich                      | T9284                   |
| Trypsin-EDTA (1X)                                         | Sigma Aldrich                      | T3924                   |
| VECTASHIELD antifade mounting medium                      | Vector Laboratories                | H-1000-10               |
| Vitronectin (VTN-N)                                       | Thermo Fisher                      | A14700                  |
| Y-27632 (ROCK Inhibitor)                                  | Cambridge Bioscience               | 10005583-1mg-CAY        |

**Table S2: Details of antibodies used, suppliers and catalogue numbers.**

| <b>Primary Antibodies</b>             |                          |                 |                         |                         |
|---------------------------------------|--------------------------|-----------------|-------------------------|-------------------------|
| <b>Antibody</b>                       | <b>Species Raised In</b> | <b>Dilution</b> | <b>Supplier</b>         | <b>Catalogue Number</b> |
| $\beta$ -III-tubulin                  | Rabbit                   | 1:300           | Sigma Aldrich           | T2200-200 $\mu$ L       |
| $\beta$ -III-tubulin                  | Mouse                    | 1:300           | Sigma Aldrich           | T8660-2mL               |
| LMX1A                                 | Rabbit                   | 1:400           | Abcam                   | Ab139726                |
| Nestin                                | Mouse                    | 1:400           | Millipore               | MAB5326                 |
| OCT3/4                                | Goat                     | 1:100           | Santa Cruz              | J0809                   |
| Tyrosine Hydroxylase                  | Mouse                    | 1:500           | Sigma                   | T-2928-100 $\mu$ L      |
| <b>Secondary Antibodies</b>           |                          |                 |                         |                         |
| Dylight 488 horse anti-mouse IgG      |                          | 1:400           | Vector Biolabs          | DI-2488                 |
| Dylight 594 goat anti-rabbit IgG      |                          | 1:400           | Vector Biolabs          | DI-1549                 |
| Dylight 594 horse anti-mouse IgG      |                          | 1:400           | Vector Biolabs          | DI-2549                 |
| Dylight 594 horse anti-goat IgG       |                          | 1:200           | Vector Biolabs          | DI-3094                 |
| Goat anti-mouse Alexa Fluor Plus 488  |                          | 1:200           | ThermoFisher Scientific | A32723                  |
| Goat anti-rabbit Alexa Fluor Plus 594 |                          | 1:200           | ThermoFisher Scientific | A32740                  |

## Results

**Figure S1:** Extended heatmap showing the detection of cytokines in the secretome of cells throughout differentiation towards dopaminergic neurons. Data expressed as the mean pixel density of the two spots on the array for each cytokine (n=1).

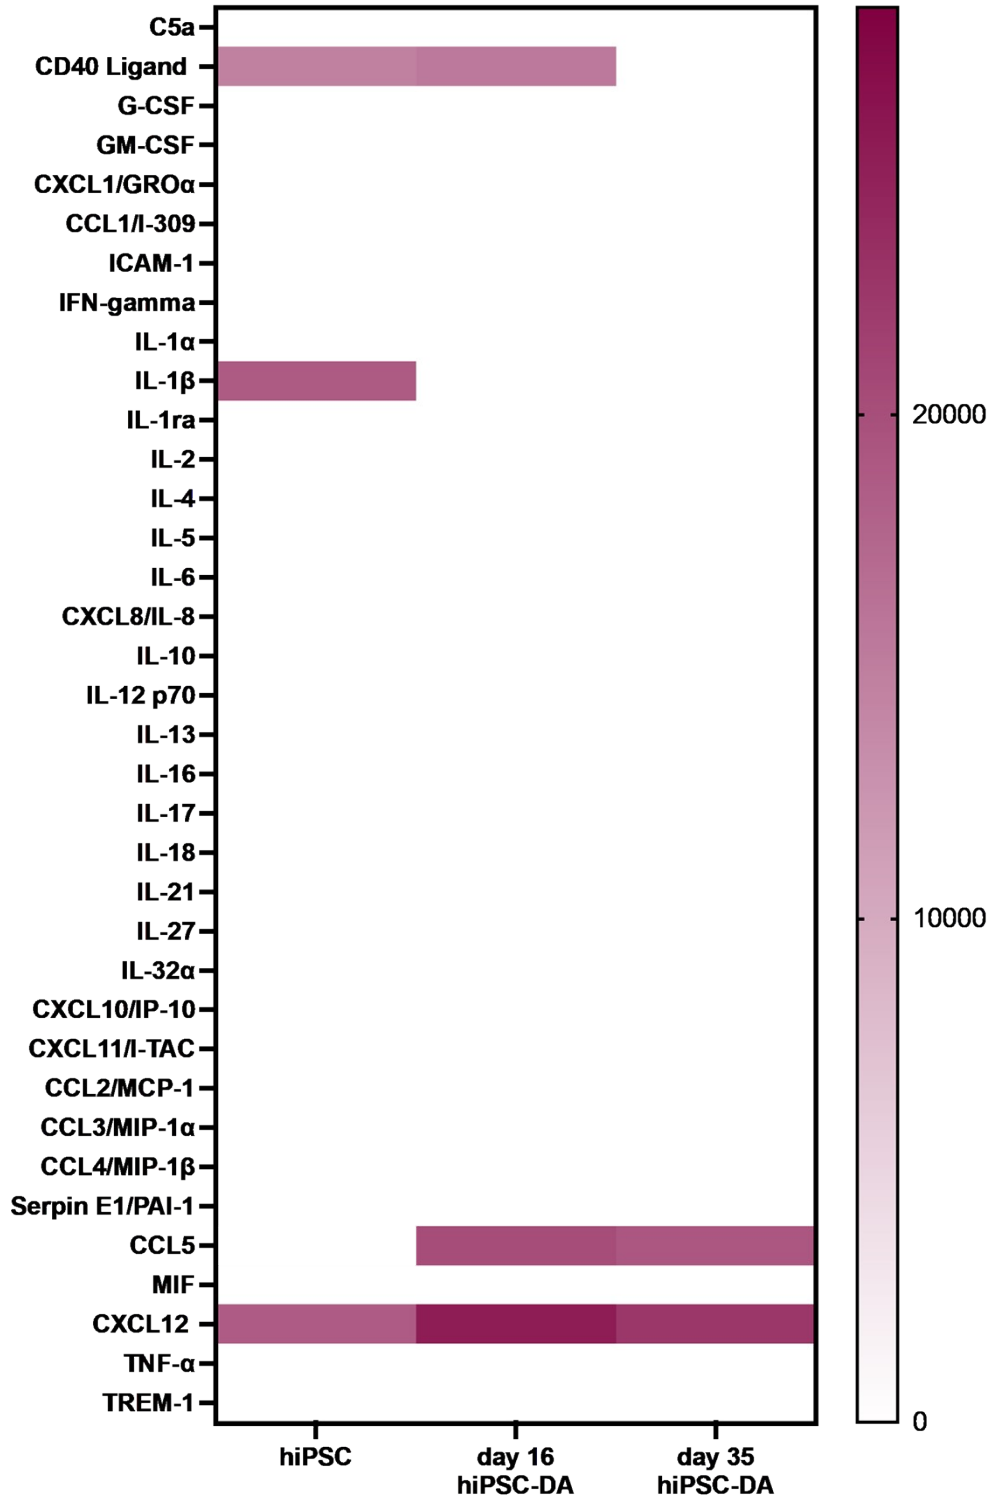

**Equations S1-4:** Tate's law implies a limit to droplet size based on the force balance between the droplet's gravity G (1) and the capillary force F (2), where D is droplet diameter, g is the acceleration due to gravity,  $\rho$  is the density of the liquid,  $\sigma$  is the surface tension and d is the outer diameter of the needle.<sup>1</sup> For a droplet to form, gravity must overcome the capillary force, and therefore (3) can be used to infer the minimum droplet diameter, with (4) taking swelling into account to give the final diameter Df.

$$1) G = \frac{\pi\rho g D^3}{6}$$

$$2) F = \pi\sigma d$$

$$3) D = \frac{(6\sigma d/\rho g)^{1/3}}$$

$$4) Df = D \times 140$$

**Table 3:** Assumptions made when calculating the minimum droplet diameter.

| Parameter                             | Assumption               | Reference |
|---------------------------------------|--------------------------|-----------|
| Surface tension of 2% alginate        | 56 mN/m                  | 2         |
| Density of 2% alginate                | 1.01 g/cm <sup>3</sup>   | 2         |
| Gravitational acceleration            | 9.80665 m/s <sup>2</sup> |           |
| Minimum needle diameter used          | 147 $\mu$ m              |           |
| Swelling of 2% alginate at neutral pH | 140x                     | 3         |

## References

1. T. Tate, *The London, Edinburgh, and Dublin Philosophical Magazine and Journal of Science*, 1864, **27**, 176-180.
2. P. Del Gaudio, P. Colombo, G. Colombo, P. Russo and F. Sonvico, *Int J Pharm*, 2005, **302**, 1-9.
3. K. Guruviah, P. Kumar and K. Kumar, *Desalination and Water Treatment*, 2016, **57**, 1-14.
